# Supplementary material
Source: publisher figshare collection journal article supplement (https://gsapubs.figshare.com/ndownloader/files/25374341)
Supplement: Supplementary file 1 [file 25374341]

## Sheet: Resolution
Table S2: Limit of Separability and Visibility calculations
Two-way Time	One-way Time	Depth	Dominant Frequency						Seismic Velocity			Wavelength			Limit of Separability (λ/4)			Limit of Visibility (λ/30)
[TWT]	[OWT]		Inline 1100	Inline 3167	Inline 1600	Average	-0.1	+10%	Interval velocity	-0.1	+10%	Average	Maximum	Minimum	Average	Maximum	Minimum	Average	Maximum	Minimum
(s)	(s)	(m)							(m/s)	(m/s)	(m/s)				(m)	(m)	(m)	(m)	(m)	(m)
2.8	1.4	2462.13	46	28	37	37	33.3	40.7
2.9	1.45	2594.35	39	31	29	33	29.7	36.3	2644.47	2380.03	2908.92	80.1356	97.9435	65.5655	20.0339	24.4859	16.3914	2.67119	3.26478	2.18552
3	1.5	2731.17	37	36	35	36	32.4	39.6	2736.42	2462.78	3010.07	76.0118	92.9033	62.1915	19.0029	23.2258	15.5479	2.53373	3.09678	2.07305
3.1	1.55	2872.59	36	36	35	35.6667	32.1	39.2333	2828.38	2545.54	3111.21	79.3002	96.9225	64.882	19.8251	24.2306	16.2205	2.64334	3.23075	2.16273
3.2	1.6	3018.61	36	36	49	40.3333	36.3	44.3667	2920.33	2628.29	3212.36	72.4048	88.4947	59.2403	18.1012	22.1237	14.8101	2.41349	2.94982	1.97468
3.3	1.65	3169.22	37	56	38	43.6667	39.3	48.0333	3012.28	2711.05	3313.5	68.9834	84.3131	56.441	17.2459	21.0783	14.1102	2.29945	2.81044	1.88137
3.4	1.7	3324.43	30	29	39	32.6667	29.4	35.9333	3104.23	2793.8	3414.65	95.0274	116.145	77.7497	23.7568	29.0361	19.4374	3.16758	3.87148	2.59166
3.5	1.75	3484.24	30	42	35	35.6667	32.1	39.2333	3196.18	2876.56	3515.8	89.6125	109.526	73.3193	22.4031	27.3816	18.3298	2.98708	3.65088	2.44398
3.6	1.8	3648.65	28	25	23	25.3333	22.8	27.8667	3288.13	2959.32	3616.94	129.795	158.638	106.196	32.4486	39.6594	26.5489	4.32648	5.28793	3.53985
3.7	1.85	3817.65	26	25	23	24.6667	22.2	27.1333	3380.08	3042.07	3718.09	137.03	167.481	112.116	34.2576	41.8703	28.0289	4.56767	5.58271	3.73719
3.8	1.9	3991.25	25	24	29	26	23.4	28.6	3472.03	3124.83	3819.23	133.54	163.215	109.26	33.3849	40.8038	27.3149	4.45132	5.4405	3.64199
3.9	1.95	4169.45	25	22	28	25	22.5	27.5	3563.98	3207.58	3920.38	142.559	174.239	116.639	35.6398	43.5598	29.1598	4.75197	5.80797	3.88798
4	2	4352.25	25	21	28	24.6667	22.2	27.1333	3655.93	3290.34	4021.52	148.213	181.15	121.266	37.0533	45.2874	30.3164	4.94045	6.03832	4.04218
4.1	2.05	4539.64	26	21	26	24.3333	21.9	26.7667	3747.88	3373.09	4122.67	154.023	188.25	126.018	38.5056	47.0624	31.5046	5.13408	6.27499	4.20061
4.2	2.1	4731.63	22	21	24	22.3333	20.1	24.5667	3839.83	3455.85	4223.81	171.933	210.14	140.672	42.9832	52.535	35.1681	5.73109	7.00467	4.68907
4.3	2.15	4928.22	20	20	17	19	17.1	20.9	3931.78	3538.6	4324.96	206.936	252.922	169.311	51.734	63.2304	42.3278	6.89786	8.43072	5.64371
4.4	2.2	5129.41	20	21	17	19.3333	17.4	21.2667	4023.73	3621.36	4426.11	208.124	254.374	170.283	52.031	63.5935	42.5708	6.93747	8.47913	5.67611
4.5	2.25	5335.19	16	21	19	18.6667	16.8	20.5333	4115.68	3704.11	4527.25	220.483	269.479	180.395	55.1208	67.3698	45.0988	7.34943	8.98264	6.01317
*colour corresponds to depth interval hosting the dike-induced faults

## Sheet: G48171
Magee, C., and Jackson, C.A.-L., 2020, Can we relate the surface expression of dike-induced normal faults to subsurface dike geometry?: Geology, v. 49, https://doi.org/10.1130/G48171.1
